# Supplementary material
Source: PubMed Central journal article supplement (PMC2797716)
Supplement: mmc1.pdf [file mmc1.pdf]

|                          | N° of cases analysed | WT                 | p.G12R   | p.G12C    | p.G12S   | p.G12V     | p.G12A   | p.G12D     | p.G13D    | p.G13C   | Codon 12 mutated | Codon 13 mutated | Mutated total |
|--------------------------|----------------------|--------------------|----------|-----------|----------|------------|----------|------------|-----------|----------|------------------|------------------|---------------|
| <b>Sanger sequencing</b> | 260                  | <b>152 (58.5%)</b> | 1 (0.4%) | 11 (4.2%) | 6 (2.3%) | 28 (10.8%) | 4 (1.5%) | 33 (12.7%) | 24 (9.2%) | 1 (0.4%) | 83 (31.9%)       | 25 (9.6%)        | 108 (41.5%)   |
| <b>Array</b>             | 235                  | <b>131 (55.7%)</b> | 0 (0%)   | 12 (5.1%) | 7 (3.0%) | 30 (12.8%) | 3 (1.3%) | 32 (13.6%) | 19 (8.1%) | 1 (0.4%) | 84 (35.7%)       | 20 (8.6%)        | 104 (44.3%)   |
| <b>Melting curve</b>     | 190                  | <b>113 (59.5%)</b> | -        | -         | -        | -          | -        | -          | -         | -        | -                | -                | 77 (40.5%)    |
| <b>Pyrosequencing</b>    | 138                  | <b>87 (63%)</b>    | 0 (0%)   | 5 (3.6%)  | 4 (2.9%) | 14 (10.2%) | 2 (1.4%) | 18 (13.1%) | 7 (5.1%)  | 1 (0.7%) | 43 (31.2%)       | 8 (5.8%)         | 51 (37%)      |
